# Supplementary material for: A new formation strategy of hybrid perovskites via room temperature reactive polyiodide melts
Source: Royal Society of Chemistry journal article supplement (doi:10.1039/c7mh00201g), 2017-01-01
Supplement: c7mh00201g1.pdf [file c7mh00201g1.pdf]

## Supplementary Information

### **New formation strategy of hybrid perovskites *via* room temperature reactive polyiodide melts**

Andrey A. Petrov<sup>1</sup>, Nikolai A. Belich<sup>1</sup>, Aleksei Y. Grishko<sup>1</sup>, Nikita M. Stepanov<sup>1</sup>, Sergey G. Dorofeev<sup>2</sup>, Eugene G. Maksimov<sup>3</sup>,  
Andrei V. Shevelkov<sup>2</sup>, Shaik M. Zakeeruddin<sup>4</sup>, Michael Graetzel<sup>4\*</sup>, Alexey B. Tarasov<sup>1,2\*</sup>, Eugene A. Goodilin<sup>1,2</sup>

<sup>1</sup>Laboratory of new materials for solar energetics, Department of Materials Science, Lomonosov Moscow State University; Lenin Hills, 119991, Moscow, Russia

<sup>2</sup>Department of Chemistry, Lomonosov Moscow State University; Moscow, Lenin Hills, 119991, Moscow, Russia

<sup>3</sup>Department of Biology, Lomonosov Moscow State University; Moscow, Lenin Hills, 119991, Moscow, Russia

<sup>4</sup>Laboratory of Photonics and Interfaces Institute of Chemical Sciences and Engineering École Polytechnique Fédérale de Lausanne (EPFL); Station 6, CH-1015 Lausanne, Switzerland

E-mail correspondence to [alexey.bor.tarasov@gmail.com](mailto:alexey.bor.tarasov@gmail.com) and [michael.graetzel@epfl.ch](mailto:michael.graetzel@epfl.ch)

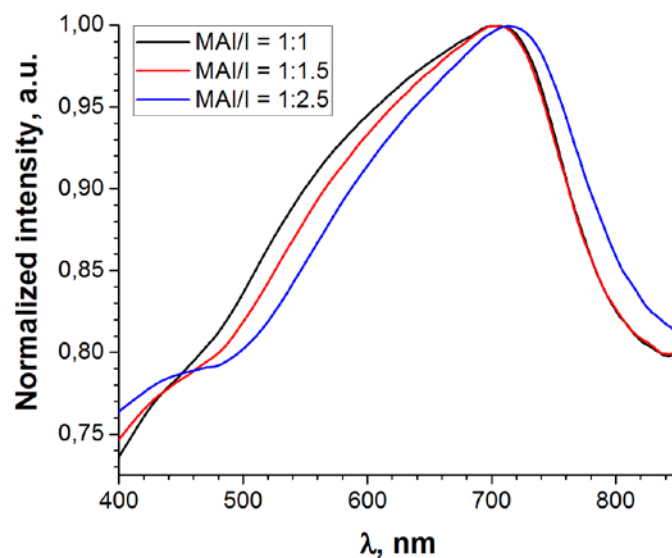

**Figure S1.** Absorption spectra of RPM with different composition (MAI:I<sub>2</sub>).

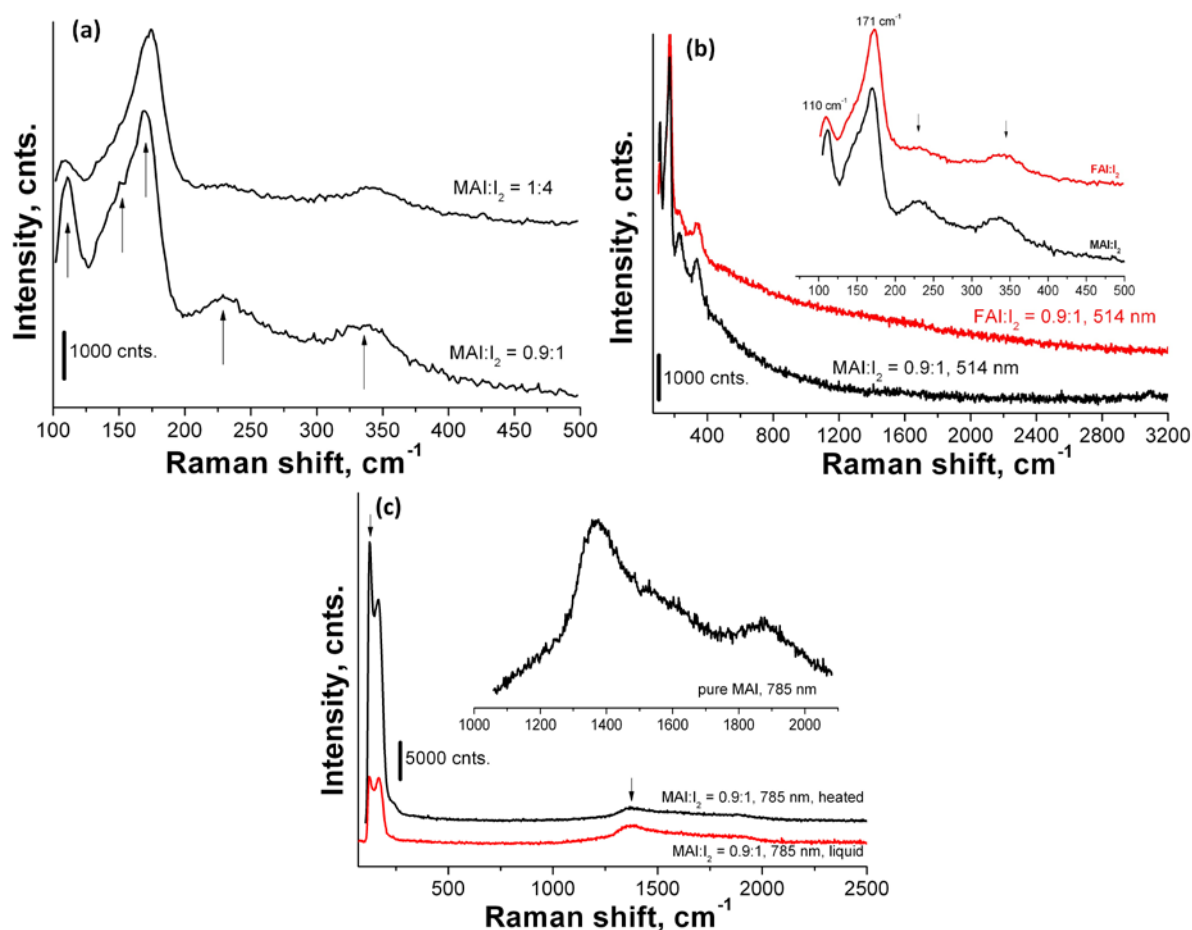

**Figure S2.** Local structure of RPM. (a) Comparison of resonant Raman spectra of the MAI/I<sub>2</sub> = 0.9:1 and 1:4 compositions (laser wavelength 514 nm). Note that strong modes of the I<sub>3</sub><sup>-</sup> ion (110, 169 cm<sup>-1</sup>) are observed while the intensity of all the peaks are changed by iodine addition due to a contribution of other polyiodides and solvating molecular iodine, (b) basically similar resonant Raman spectra of RPM of the MAI/I<sub>2</sub> = 0.9:1 and FAI/I<sub>2</sub> = 0.9:1 compositions in the extended range, (c) a comparison of IR Raman spectra of RPM of the MAI/I<sub>2</sub> = 0.9:1 composition before and after iodine sublimation by drying (laser wavelength 785 nm). The arrows indicate peaks of the MA<sup>+</sup> constituent.

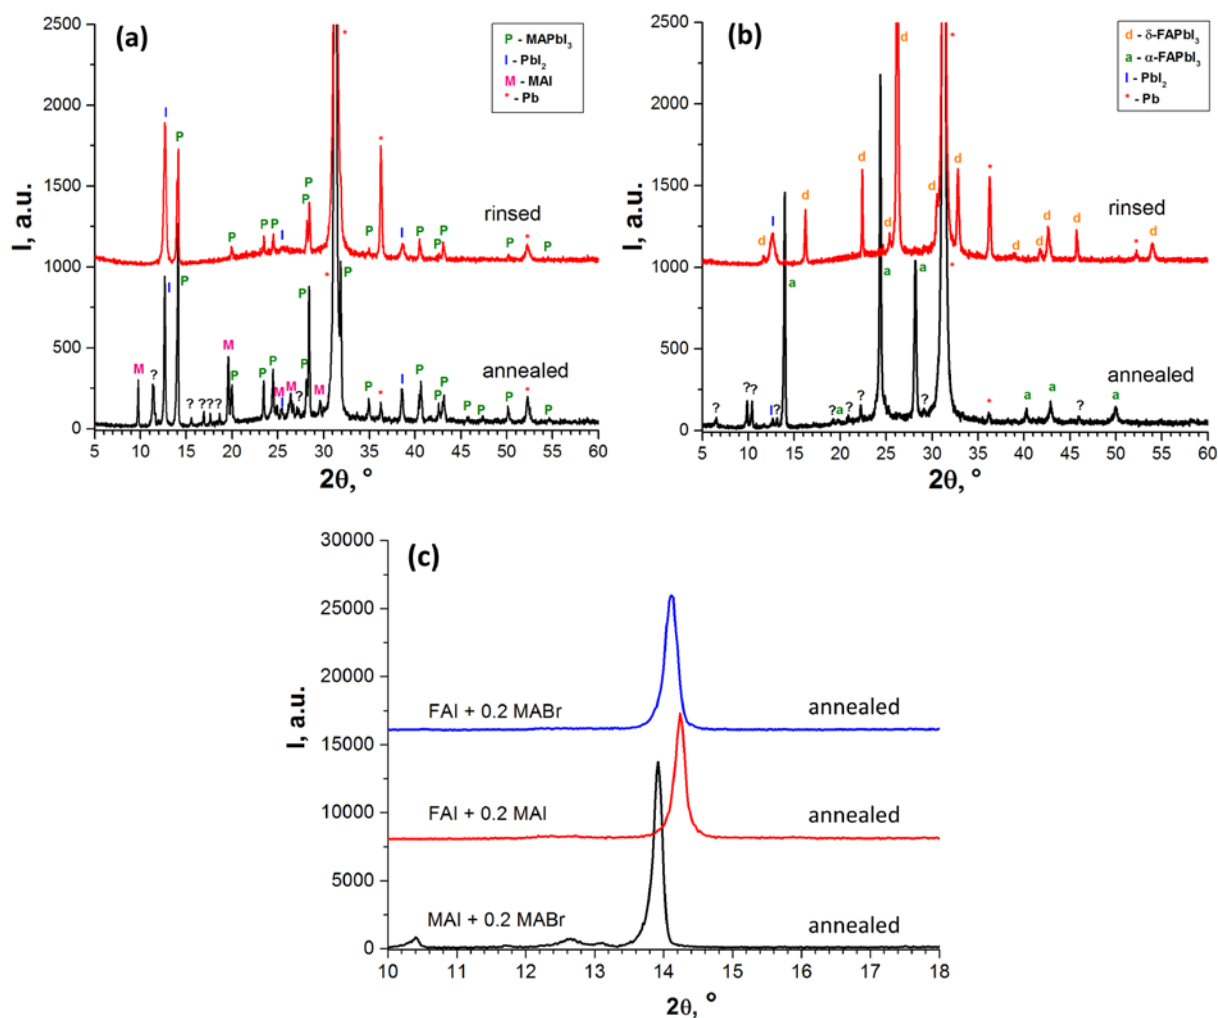

**Figure S3.** XRD of the films annealed at 115°C for 10 minutes after spin-coating and XRD of the films rinsed with isopropanol after spin-coating for comparison. (a) MAPbI<sub>3</sub> film obtained from RPM of FAI-I<sub>2</sub>, (b) FAPbI<sub>3</sub> film obtained from RPM of FAI-I<sub>2</sub>, (c) films with mixed compositions.

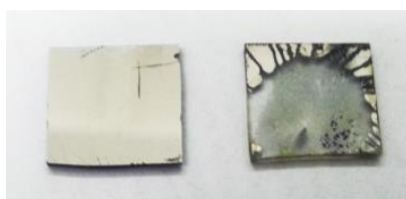

**Figure S4.** 50 nm thickness film of lead treated with MAI<sub>3+x</sub> for 15 seconds.

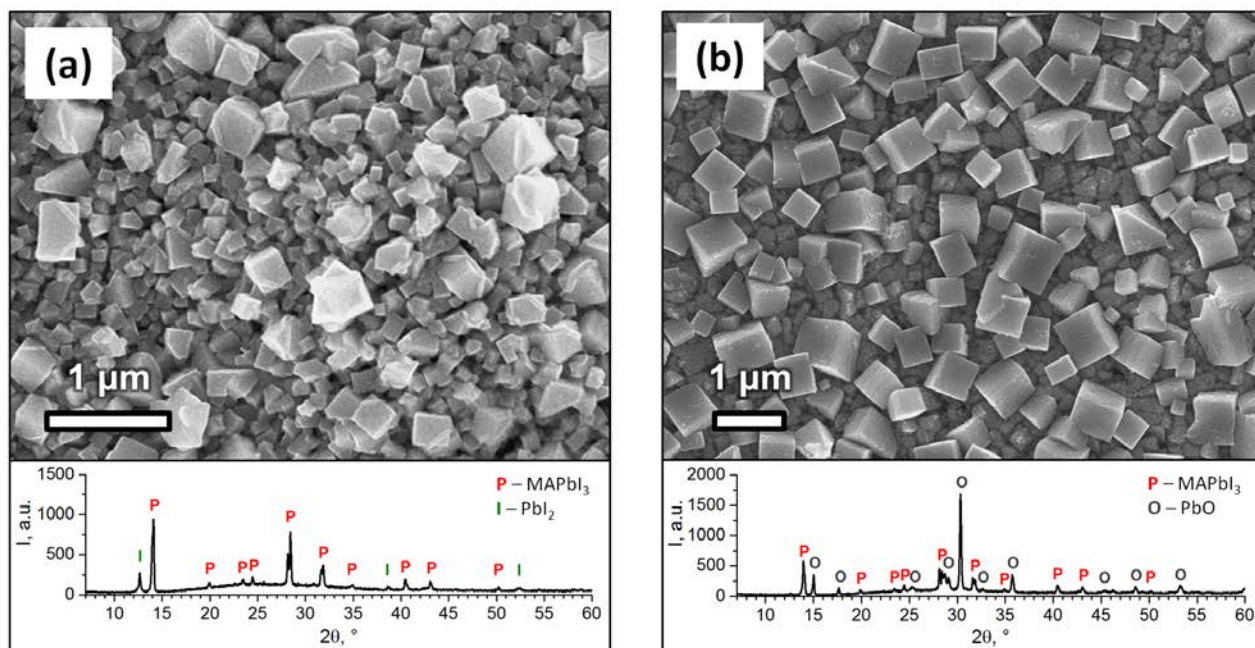

**Figure S5.** SEM and XRD of perovskite MAPbI<sub>3</sub> films obtained by reactions of MAI<sub>3+x</sub> with PbI<sub>2</sub> film (a) and PbO film (b).

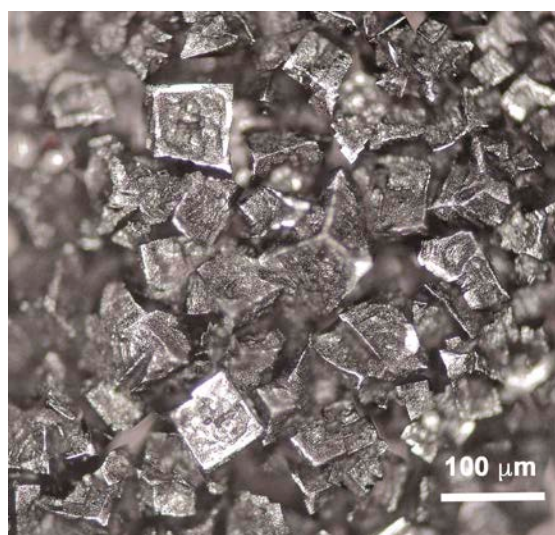

**Figure S6.** Perovskite MAPbI<sub>3</sub> crystals obtained through an iodine evaporation from the sample #4.

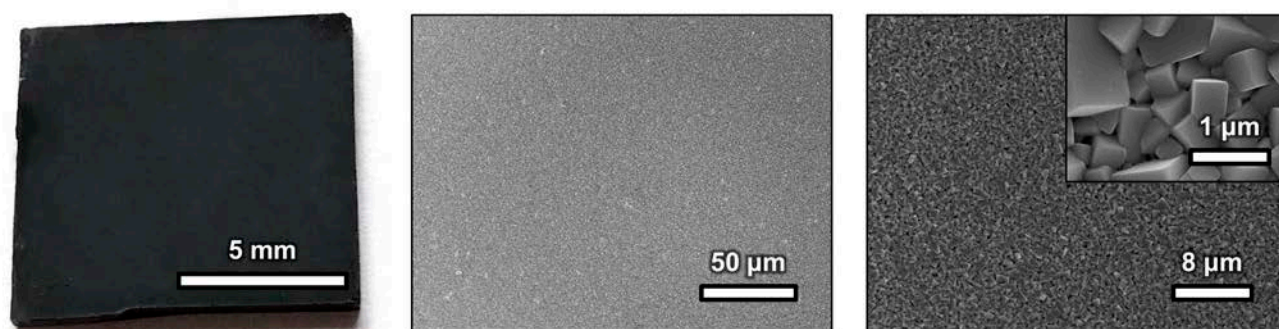

**Figure S7.** Perovskite MAPbI<sub>3</sub> obtained by reaction of MAI<sub>3+x</sub> with 200 nm thickness film of lead.

**Table S1.** Charge carrier lifetimes in perovskite films obtained from the melts with various compositions.

| Melt composition (X/I <sub>2</sub> = 1:2) | Charge carrier lifetimes |              |
|-------------------------------------------|--------------------------|--------------|
|                                           | $\tau_1$                 | $\tau_2$     |
| X = MAI                                   | 66 ns (29%)              | 210 ns (71%) |
| X = 0.8 MAI + 0.2 MABr                    | 2 ns (83%)               | 13 ns (17%)  |
| X = 0.8 FAI + 0.2 MAI                     | 50 ns (45%)              | 190 ns (55%) |
| X = 0.8 FAI + 0.2 MABr                    | 44 ns (55%)              | 164 ns (45%) |
